# Supplementary material
Source: PubMed Central journal article supplement (PMC11534150)

**Supplemental Table 1. Differentially expressed genes (DEGs) in female control adrenal glands between 9- and 6-weeks of age.**

|                       | <b>Gene Name</b>  | <b>Description</b>                              | <b>Log2Fold Change</b> | <b>padj</b> |
|-----------------------|-------------------|-------------------------------------------------|------------------------|-------------|
| <b>Up Regulated</b>   | <i>Gm13394</i>    | predicted gene 13394                            | 2.54                   | 2.44E-05    |
|                       | <i>Jchain</i>     | immunoglobulin joining chain                    | 1.59                   | 8.23E-04    |
|                       | <i>Igkv10-96</i>  | immunoglobulin kappa variable 10-96             | 1.55                   | 2.42E-03    |
|                       | <i>Igkc</i>       | immunoglobulin kappa constant                   | 1.35                   | 8.57E-03    |
|                       | <i>Tmem196</i>    | transmembrane protein 196                       | 1.29                   | 2.04E-02    |
|                       | <i>Igkv17-121</i> | immunoglobulin kappa variable 17-121            | 1.49                   | 2.04E-02    |
|                       | <i>C1rb</i>       | complement component 1, r subcomponent B        | 0.91                   | 3.11E-02    |
|                       | <i>Ighv3-6</i>    | immunoglobulin heavy variable 3-6               | 1.41                   | 4.28E-02    |
|                       | <i>Insr</i>       | insulin receptor                                | 0.41                   | 4.54E-02    |
|                       | <i>Unc5c</i>      | unc-5 netrin receptor C                         | 0.56                   | 4.54E-02    |
|                       | <i>C1s2</i>       | complement component 1, s subcomponent 2        | 1.28                   | 4.54E-02    |
|                       | <i>Gpr31c</i>     | G protein-coupled receptor 31, D17Leh66c region | 1.33                   | 4.54E-02    |
|                       | <i>Fgb</i>        | fibrinogen beta chain                           | 0.00                   | 4.90E-02    |
|                       | <i>Ociad2</i>     | OCIA domain containing 2                        | 0.37                   | 4.90E-02    |
|                       | <i>Igha</i>       | immunoglobulin heavy constant alpha             | 1.12                   | 4.90E-02    |
|                       | <i>Gm5436</i>     | predicted pseudogene 5436                       | 1.17                   | 4.90E-02    |
|                       | <i>Siglech</i>    | sialic acid binding Ig-like lectin H            | 1.27                   | 4.90E-02    |
| <b>Down Regulated</b> | <i>Cyb5r1</i>     | cytochrome b5 reductase 1                       | -0.38                  | 4.08E-03    |
|                       | <i>Cisd1</i>      | CDGSH iron sulfur domain 1                      | -0.31                  | 9.94E-03    |
|                       | <i>Padi2</i>      | peptidyl arginine deiminase, type II            | -1.47                  | 1.42E-02    |
|                       | <i>Gm16587</i>    | predicted gene 16587                            | -1.73                  | 4.54E-02    |
|                       | <i>Omp</i>        | olfactory marker protein                        | -1.31                  | 4.54E-02    |
|                       | <i>Plin5</i>      | perilipin 5                                     | -1.29                  | 4.90E-02    |

Statistical analysis was performed using the Wald test, p adj <0.05.

**Supplemental Table 2. scRNAseq clusters in whole adrenals isolated from 6-week versus 9-week female *Znrf3* cKO mice.**

| <b>Group</b> | <b>Cluster</b>                           | <b>6-Week <i>Znrf3</i> cKO (%)</b> | <b>9-Week <i>Znrf3</i> cKO (%)</b> |
|--------------|------------------------------------------|------------------------------------|------------------------------------|
| Adrenal      | Capsule                                  | 0.11                               | 0.09                               |
|              | Cortex Zona Glomerulosa (zG)             | 15.36                              | 9.19                               |
|              | Cortex Zona Fasciculata (zF)             | 38.17                              | 7.39                               |
| Myeloid      | Medulla                                  | 0.02                               | 0.09                               |
|              | Macrophages                              | 10.97                              | 22.07                              |
|              | Monocytes                                | 1.55                               | 2.87                               |
|              | Conventional Dendritic Cells 1 (cDCs1)   | 2.88                               | 10.11                              |
|              | Conventional Dendritic Cells 2 (cDCs2)   | 0.89                               | 1.41                               |
|              | Monocyte-derived Dendritic Cells (MoDCs) | 0.2                                | 0.95                               |
|              | Myeloid-derived Suppressor Cells (MDSCs) | 0.24                               | 0.66                               |
|              | Suppressive Neutrophils                  | 2.5                                | 5.46                               |
|              | Immature Neutrophils                     | 0.01                               | 2.26                               |
| Lymphoid     | Natural Killer (NK) Cells                | 4.07                               | 9.64                               |
|              | T Cells                                  | 0.73                               | 2.09                               |
|              | B Cells                                  | 1.71                               | 3.26                               |
|              | Plasmacytoid Dendritic Cells (pDCs)      | 0.35                               | 0.89                               |
| Other        | Endothelial Cells                        | 18.25                              | 16.49                              |
|              | Proliferating Immune                     | 1.13                               | 4.08                               |
|              | Unknown                                  | 0.91                               | 1.00                               |

**Supplemental Table 3. Immune cell signatures and patient outcome in TCGA-ACC**

| <b>Signature Name</b> | <b>Gene List</b>                   | <b>Overall Survival</b>   | <b>Progression-Free Survival</b> | <b>Male vs Female</b>     |
|-----------------------|------------------------------------|---------------------------|----------------------------------|---------------------------|
| Macrophage            | <i>C1QA, C1QB, APOE, MERTK</i>     | p=0.406                   | p=0.181                          | *p=3.94x10 <sup>-2</sup>  |
| Phag. Mac.            | <i>CD68, TREM2, TYROBP</i>         | p=0.296                   | *p=4.18x10 <sup>-2</sup>         | **p=2.91x10 <sup>-3</sup> |
| Dendritic             | <i>CD209, ITGAE, IRF8, TLR3</i>    | p=0.653                   | p=0.111                          | p=0.823                   |
| Neutrophil            | <i>S100A8, S100A9, MMP9, CSF3R</i> | p=0.971                   | p=0.324                          | *p=1.82x10 <sup>-2</sup>  |
| B Cell                | <i>CD79A, CD79B, RAG1, CD22</i>    | **p=4.70x10 <sup>-3</sup> | **p=4.47x10 <sup>-3</sup>        | p=0.792                   |
| NK Cell               | <i>GZMA, GZMB, CCL5, NKG7</i>      | p=0.092                   | ***p=3.58x10 <sup>-4</sup>       | *p=3.86x10 <sup>-2</sup>  |
| T Cell                | <i>CD3E, CD3D, CCR7, CTLA4</i>     | p=0.103                   | **p=1.62x10 <sup>-3</sup>        | p=0.477                   |
| Mo-Derived            | <i>ITGAX, CD68, CCR2, ITGAM</i>    | *p=3.28x10 <sup>-2</sup>  | **p=2.49x10 <sup>-3</sup>        | *p=2.17x10 <sup>-2</sup>  |
| AMRS                  | <i>ITGAM, CD33, CD68, MSR1</i>     | *p=3.55x10 <sup>-2</sup>  | *p=1.00x10 <sup>-2</sup>         | *p=4.60x10 <sup>-2</sup>  |
| Proliferation         | <i>MKi67</i>                       | **p=1.30x10 <sup>-3</sup> | ****p=2.25x10 <sup>-5</sup>      | p=0.111                   |

Analysis of immune cell signatures as well as established prognostic marker High-*MKi67* in TCGA-ACC data. Statistical analysis was performed using log-rank Mantel-Cox test.

Abbreviations: TCGA, The Cancer Genome Atlas; ACC, adrenocortical carcinoma; Phag. Mac., phagocytic macrophages; NK, natural killer; Mo-Derived, monocyte-derived; AMRS, adrenal myeloid response score.

**Supplemental Table 4. Summary of ACC patient characteristic**

| <b>N</b> | <b>Age<br/>(years)</b> | <b>Sex<br/>(male/female)</b> | <b>Overall CD68-Index<br/>(%)</b> | <b>Overall Ki67-Index<br/>(%)</b> |
|----------|------------------------|------------------------------|-----------------------------------|-----------------------------------|
| 38       | 49.1<br>(21-76)        | 17/21                        | 11.52<br>(2.51-32.46)             | 8.67<br>(0.53-29.96)              |

Data represent total number or average values with (range).

**Supplemental Table 5. List of antibodies and staining conditions for immunohistochemistry in mouse adrenal tissue.**

| Target                         | Company, Catalog #           | Species | Unmasking                                | Dilution | Blocking Buffer  | Antibody Diluent   |
|--------------------------------|------------------------------|---------|------------------------------------------|----------|------------------|--------------------|
| Cleaved caspase 3              | Cell Signaling, 9664         | Rabbit  | 10mM NaCitrate, pH 6.0, 0.05% tween 20   | 1:200    | 2.5% HS + 1% BSA | 2.5% HS + 0.1% BSA |
| Ki67                           | Thermo Fisher, MA5-14520     | Rabbit  | 10mM NaCitrate, pH 6.0, 0.05% tween 20   | 1:200    | 2.5% HS          | 2.5% HS            |
| 53BP1                          | Novus Biologicals, NB100-304 | Rabbit  | 10mM NaCitrate, pH 6.0, 0.05% tween 20   | 1:1000   | 2.5% HS + 1% BSA | 2.5% HS + 0.1% BSA |
| p21                            | Abcam, ab188224              | Rabbit  | 10mM NaCitrate, pH 6.0, 0.05% tween 20   | 1:7500   | 2.5% HS + 1% BSA | 2.5% HS + 0.1% BSA |
| CDKN2A (p16 <sup>INK4a</sup> ) | Abcam, ab211542              | Rabbit  | 10mM NaCitrate, pH 6.0, 0.05% tween 20   | 1:1000   | 2.5% HS + 1% BSA | 2.5% HS + 0.1% BSA |
| GFP                            | Abcam, ab5450                | Goat    | 10mM NaCitrate, pH 6.0                   | 1:1000   | 2.5% HS + 3% BSA | 2.5% HS + 1% BSA   |
| Ki67                           | Thermofisher, 14-5698-80     | Rat     | 10mM NaCitrate, pH 6.0                   | 1:2000   | 2.5% GS          | 2.5% GS            |
| F4/80                          | Cell Signaling, 70076        | Rabbit  | 10mM Tris, 1mM EDTA, 0.05% Tween, pH 9.0 | 1:250    | 2.5% HS + 3% BSA | 2.5% HS + 1% BSA   |
| CD11b                          | Abcam, ab133357              | Rabbit  | 10mM NaCitrate, pH 6.0                   | 1:10,000 | 2.5% HS + 3% BSA | 2.5% HS + 1% BSA   |
| CD11c                          | Cell Signaling, 97585        | Rabbit  | 10mM Tris, 1mM EDTA, pH 9.0              | 1:300    | 2.5% HS + 3% BSA | 2.5% HS + 1% BSA   |
| Ly6g                           | Cell Signaling, E6Z1T        | Rabbit  | 10mM Tris, 1mM EDTA, 0.05% Tween, pH 9.0 | 1:200    | 2.5% HS + 3% BSA | 2.5% HS + 1% BSA   |
| CD3e                           | Cell Signaling, 99940        | Rabbit  | 10mM Tris, 1mM EDTA, 0.05% Tween, pH 9.0 | 1:250    | 2.5% HS + 3% BSA | 2.5% HS + 1% BSA   |
| CD68                           | Abcam, ab125212              | Rabbit  | 10mM NaCitrate, pH 6.0                   | 1:1000   | 2.5% HS          | 2.5% HS            |

Supplemental Fig. 1: Graphical Abstract. Created with BioRender.com

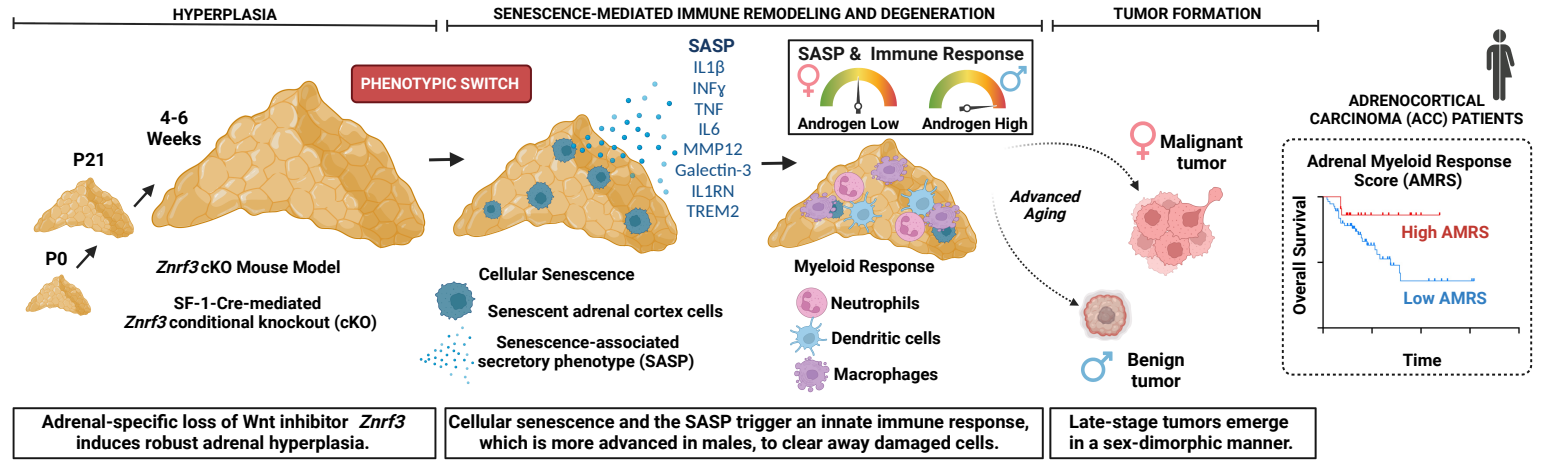

Supplemental Fig. 2: Validation of major cell types identified by scRNAseq

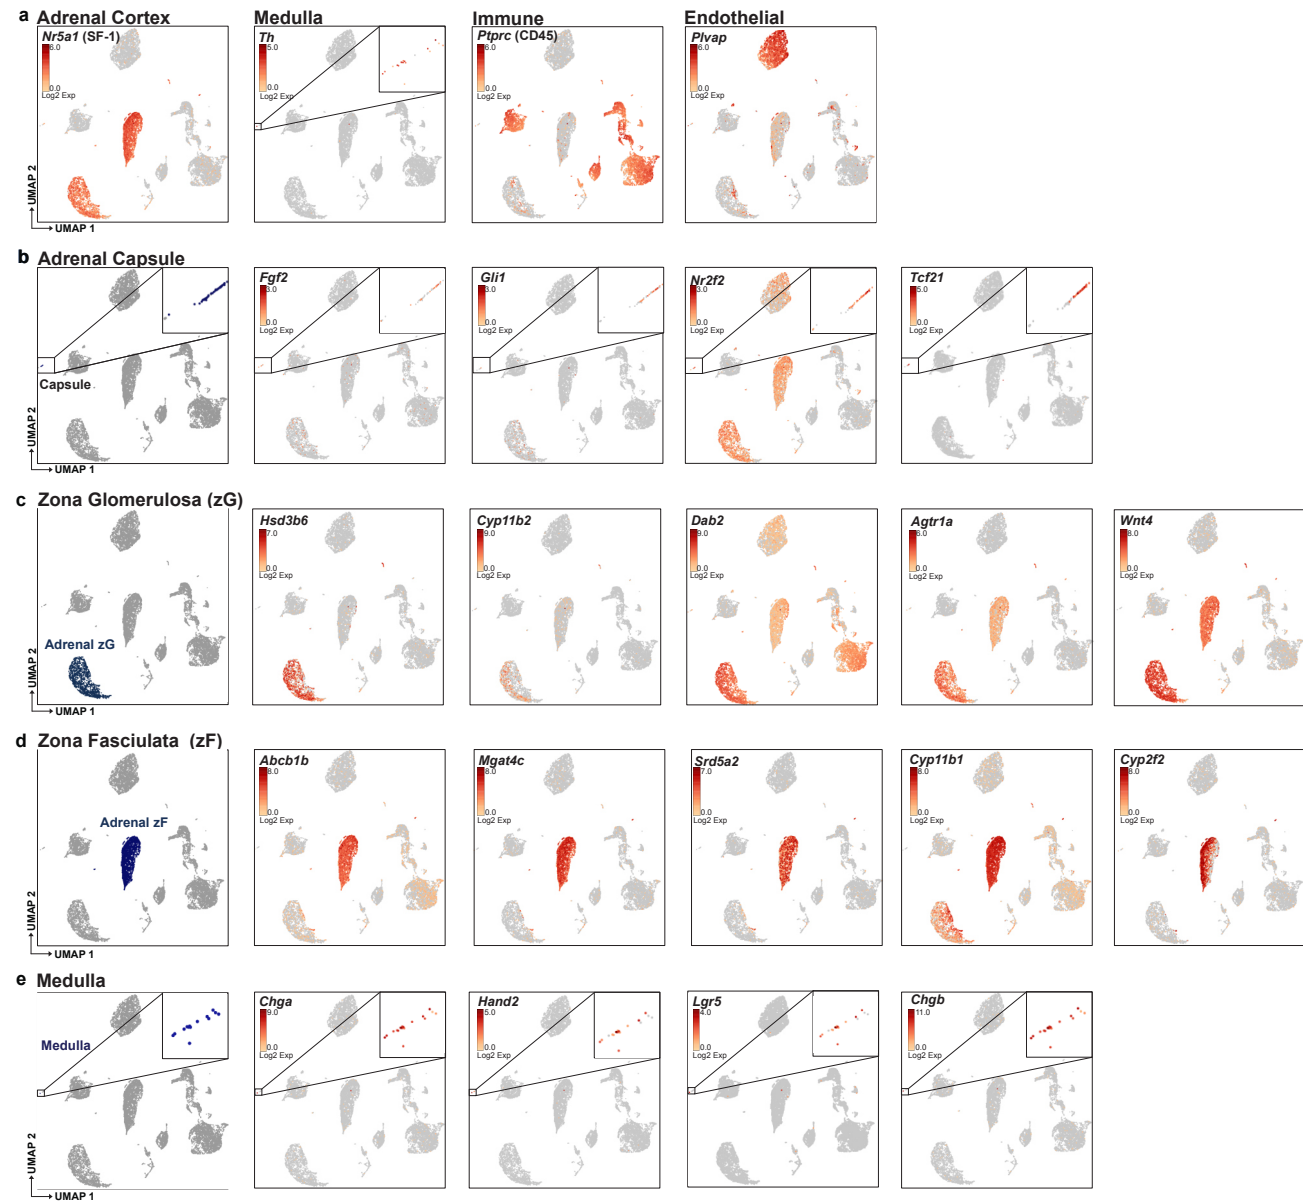

**f Myeloid Cells**

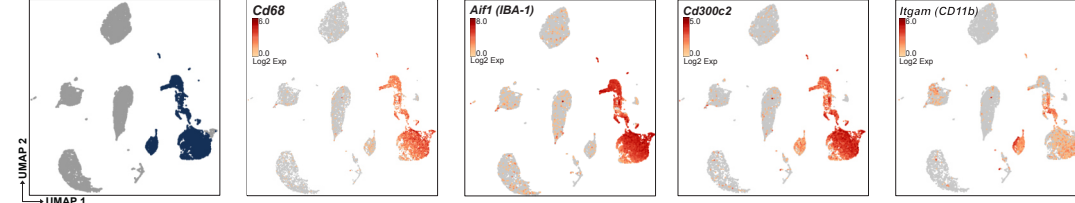

**g Macrophages**

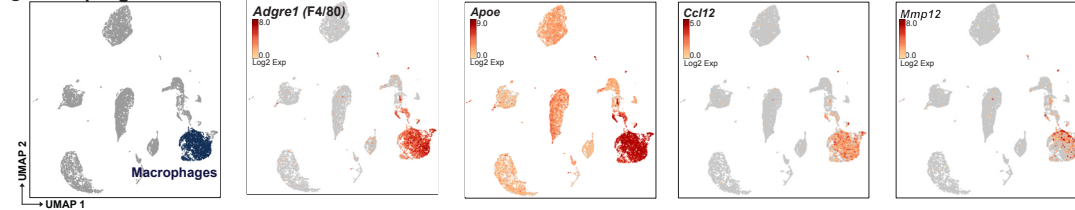

**h Monocytes**

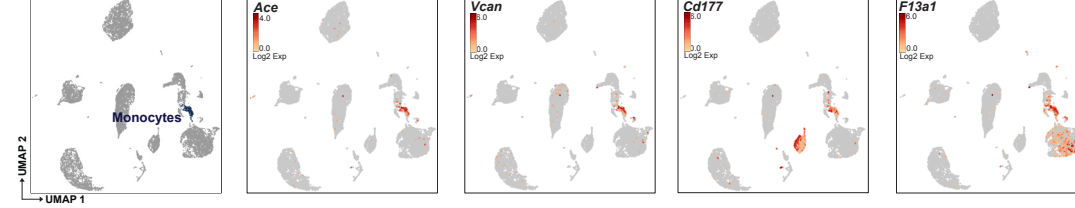

**i MDSCs**

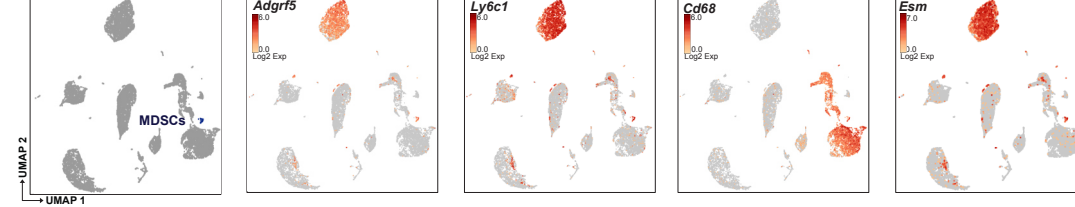

**j cDCs 1**

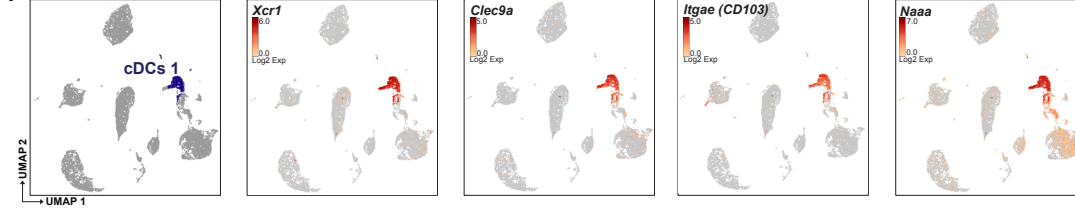

**k cDCs 2**

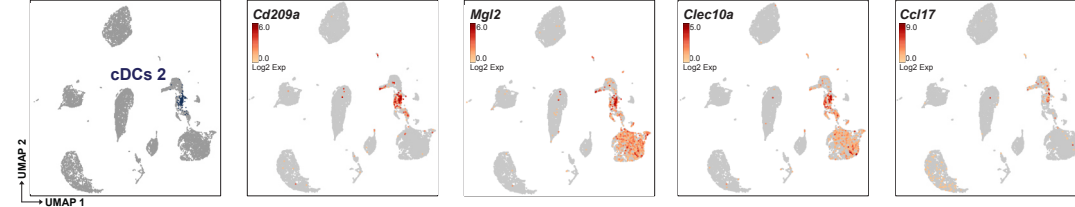

**l MoDCs**

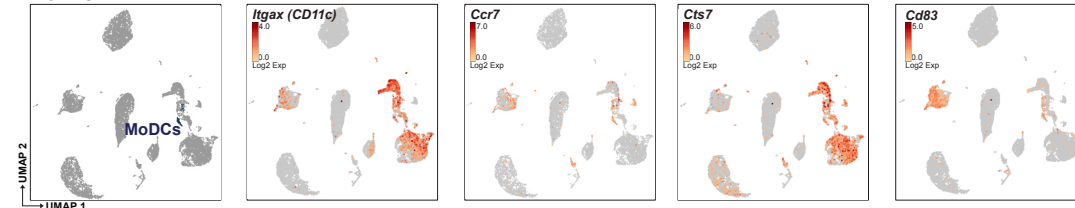

**m Neutrophils (Suppressive)**

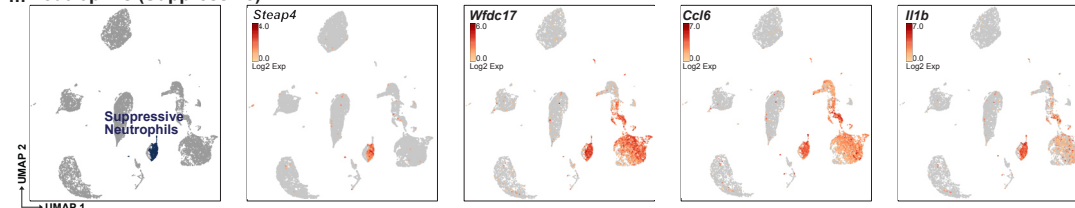

**n Neutrophils (Immature)**

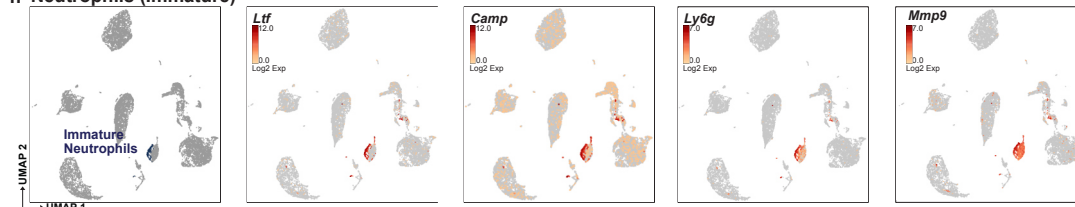



**o Natural Killer (NK) Cells**

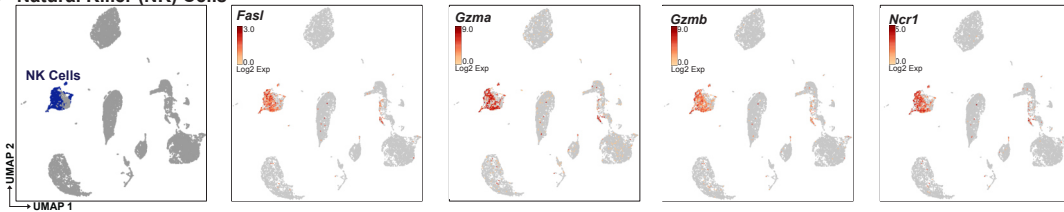

**p B Cells**

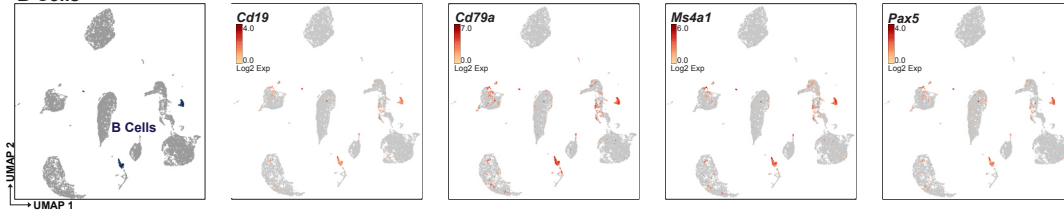

**q T Cells**

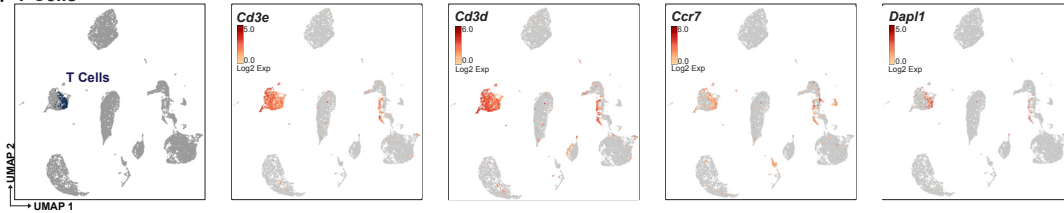

**r Plasmacytoid Dendritic Cells (pDCs)**

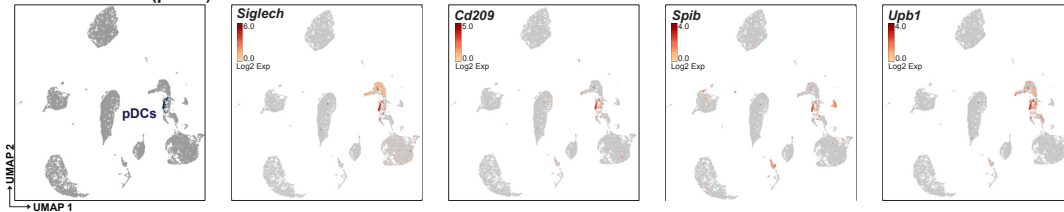

**s Endothelial Cells**

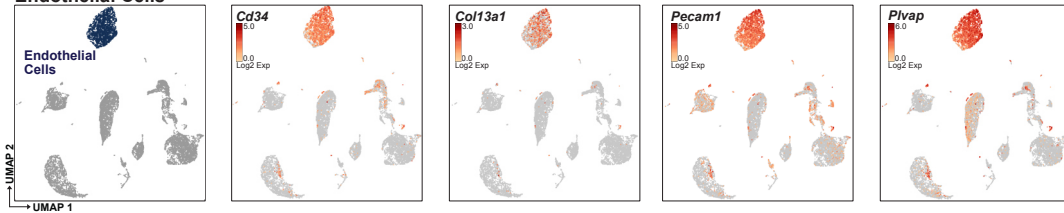

**t Proliferating Immune**

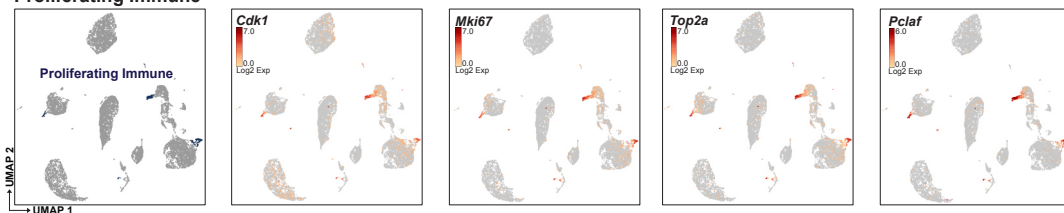

**Supplemental Fig. 3: Extended adrenal weight analysis.**

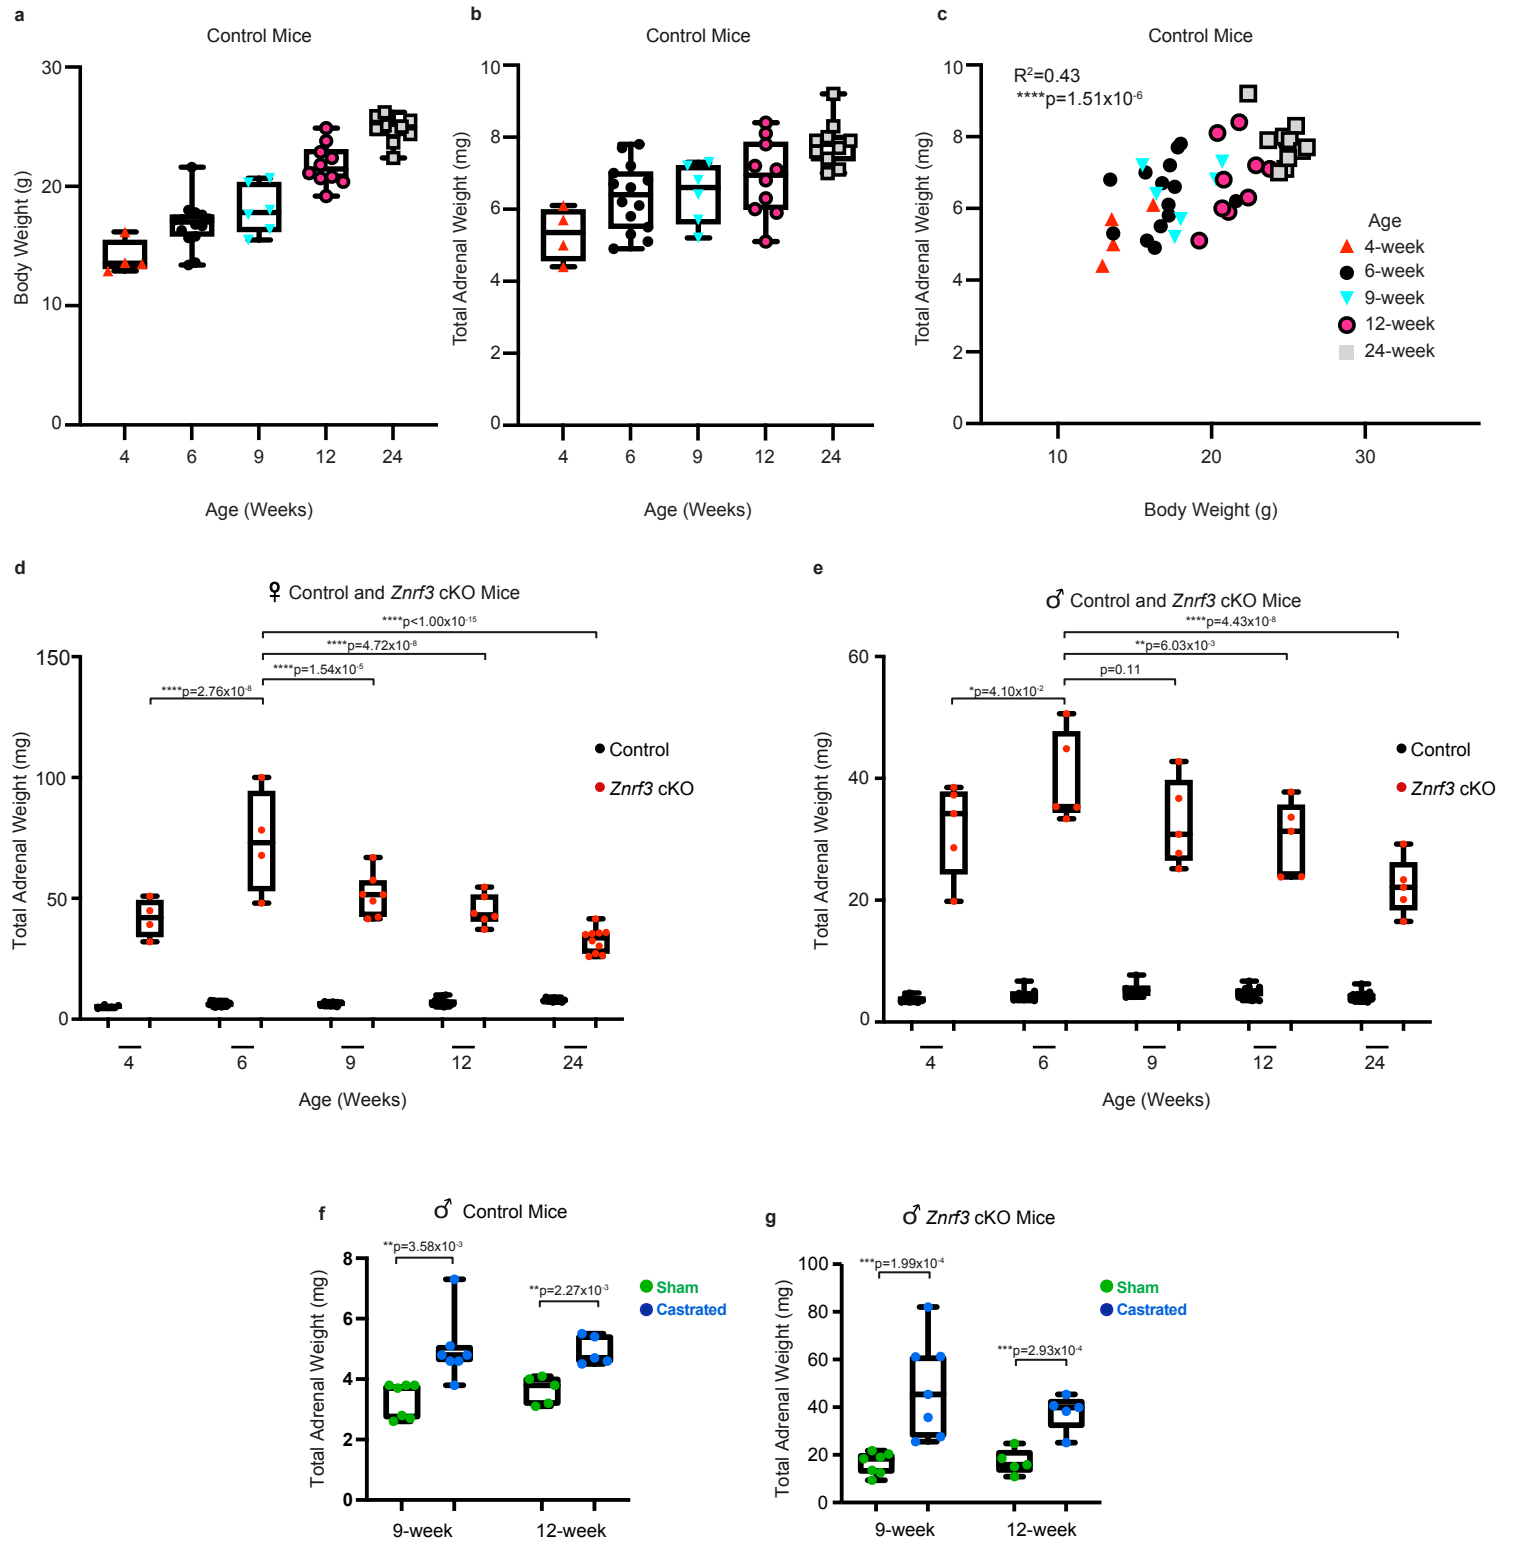

**Supplemental Fig. 4: FACS gating strategy for isolation of dissociated adrenal cells for scRNAseq**

**(a) 6-week *Znrf3* cKO Female**

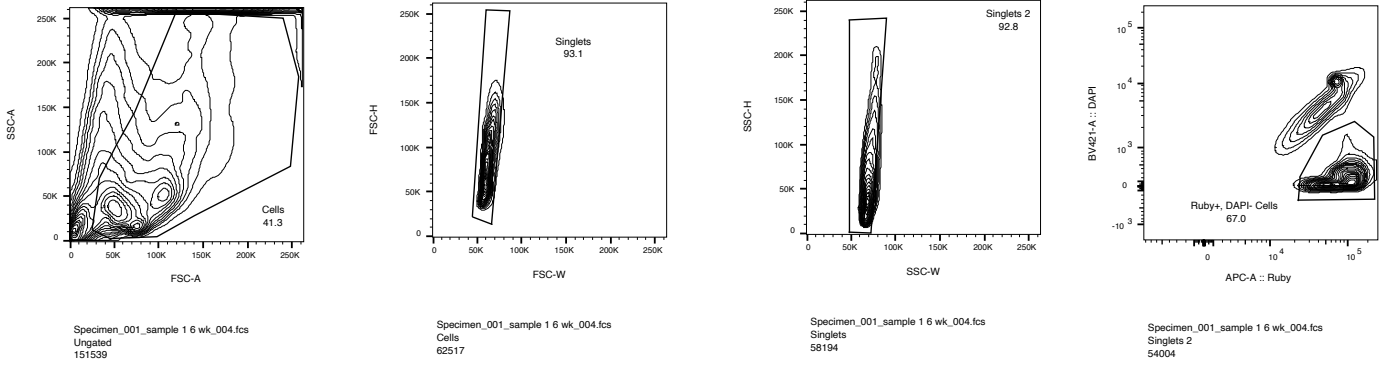

**(b) 9-week *Znrf3* cKO Female**

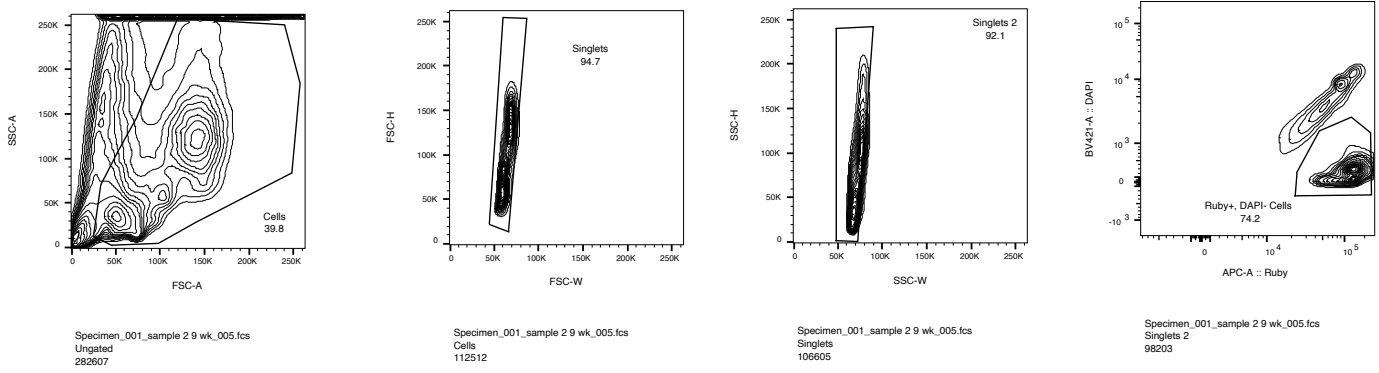

Supplement: NIHMS2025628-supplement-Supplementary_Data.pdf [file NIHMS2025628-supplement-Supplementary_Data.pdf]
